# Supplementary material for: Scientific selection: A century of increasing crop varietal diversity in US wheat
Source: PubMed Central journal article supplement — Proc Natl Acad Sci U S A. 2022 Dec 13;119(51):e2210773119. doi: 10.1073/pnas.2210773119 (PMC9907116; doi:10.1073/pnas.2210773119), 2022-12-13
Supplement: pnas.2210773119.sapp.pdf [file pnas.2210773119.sapp.pdf]

## **Supplementary Information for** Scientific Selection: A Century of Increasing Crop Varietal Diversity in U.S. Wheat

Yuan Chai<sup>\*</sup>, Philip G. Pardey, Kevin A.T. Silverstein

<sup>\*</sup> Corresponding author: Yuan Chai

**Email:** [chaix026@umn.edu](mailto:chaix026@umn.edu)

### **This PDF file includes:**

Supplementary text  
Figures S1 to S3  
Tables S1  
SI References

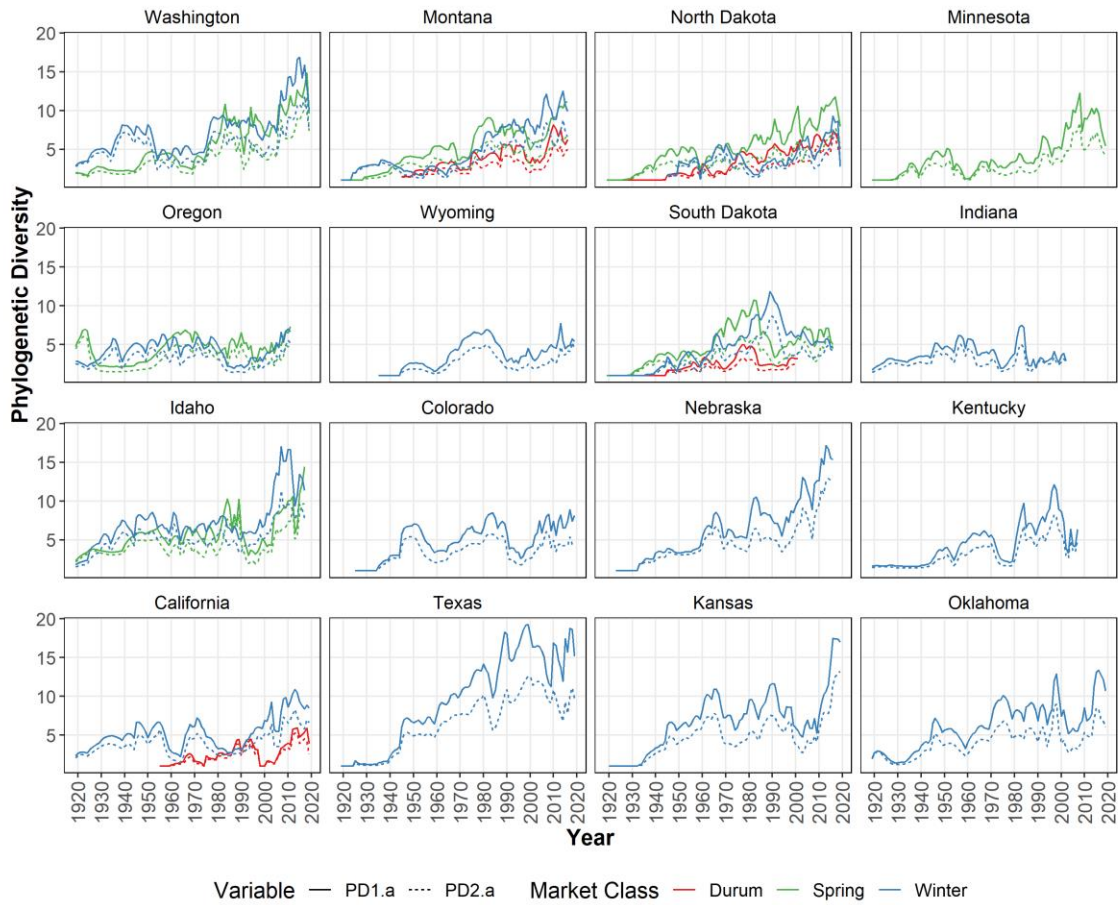

**Fig. S1. Comparing phylogenetic diversity indexes of order 1 and 2 for major U.S. wheat producing states, 1919-2019.**

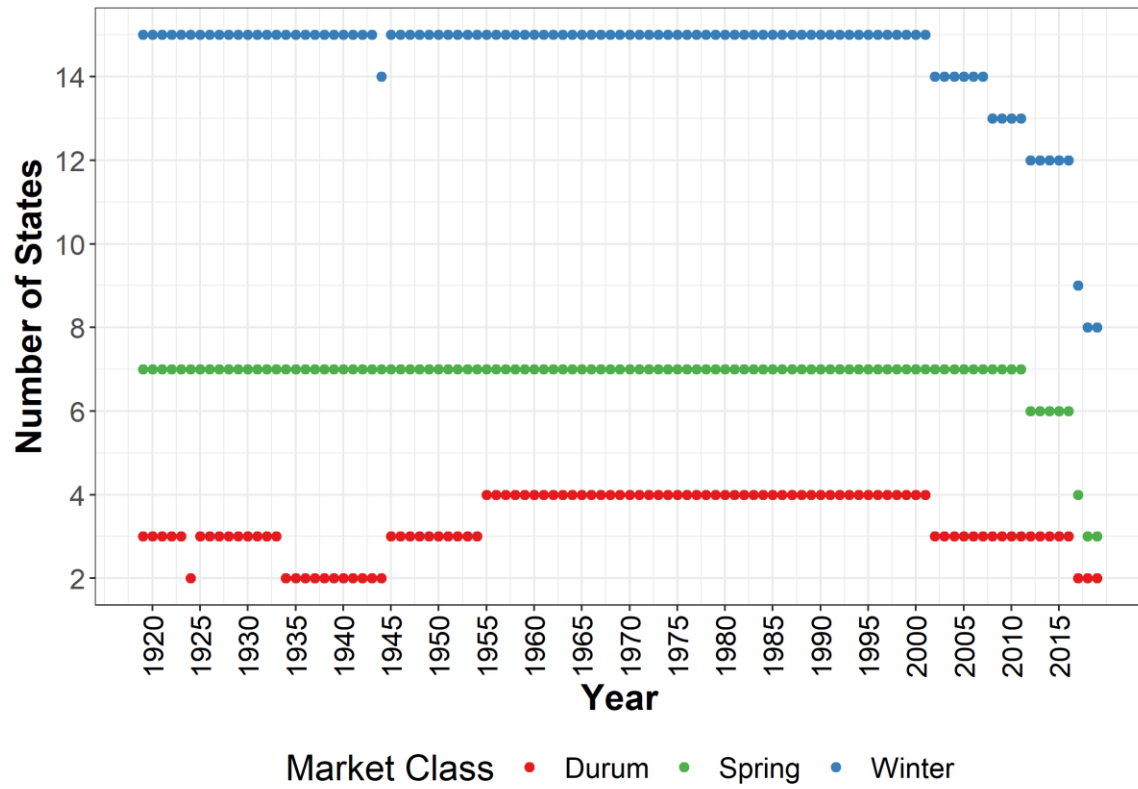

**Fig. S2. Total number of states with state-level area-by-variety data available for U.S. wheat, 1919-2019.**

Notes: The number of states reported here include interpolated data to fill in missing years when possible. Data availability for more recent years dropped significantly, especially after 2016.

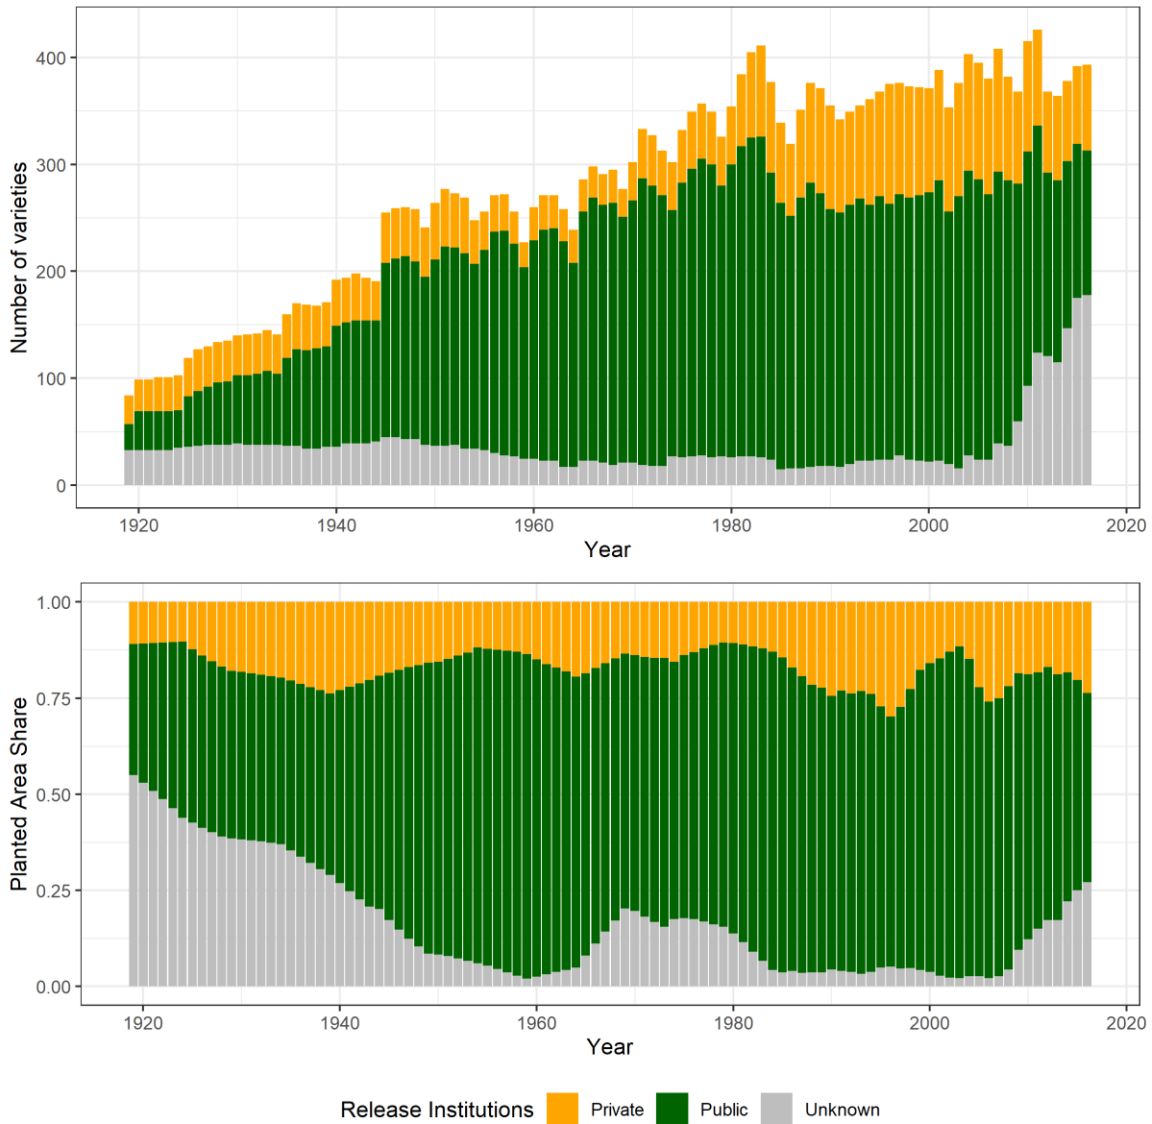

**Fig. S3. Number of varieties and planted area share by releasing institutions for U.S. wheat, 1919-2016.**

Notes: The numbers reported in this figure only include available data collected by authors in selected states. The “Unknown” category include varieties without releasing institution information. Data availability for more recent years dropped significantly, especially after 2016.

**Table S1. Summary of selected prior wheat diversity studies.**

| Studies                 | Number of varieties                  | Spatial and Temporal Extent                                                                            | Taxonomy-informed Diversity Measures |                   |                               | Taxonomy-blind Diversity Measures | Spatial / Temporal Dynamic Measures   |
|-------------------------|--------------------------------------|--------------------------------------------------------------------------------------------------------|--------------------------------------|-------------------|-------------------------------|-----------------------------------|---------------------------------------|
|                         |                                      |                                                                                                        | Pedigree-based                       | Phenotypic traits | Molecular marker <sup>1</sup> |                                   |                                       |
| Cox et al. (1)          | Between 60 and 262 depending on year | U.S. winter wheat states (1919-1984)                                                                   | COP (area weighted)                  | - <sup>2</sup>    | -                             | -                                 | Time trend of COP                     |
| Murphy et al. (2)       | 110                                  | U.S. winter wheat states                                                                               | COP                                  | -                 | -                             | -                                 | -                                     |
| Kim and Ward (3)        | 22                                   | North America                                                                                          | COP                                  | -                 | RFLP                          | -                                 | -                                     |
| Brennan and Byerlee (4) | not specified                        | Regions in Argentina, Australia, Brazil, Mexico, Netherlands, New Zealand Pakistan, U.S. (1970-1986)   | -                                    | -                 | -                             | Varietal area and age             | Time trend of varietal area and age   |
| Chen et al. (5)         | 45                                   | 25 varieties from U.S.<br>20 varieties from China, Pakistan, India, Iraq, Hungary, Austria, Yugoslavia | -                                    | -                 | STS                           | -                                 | -                                     |
| Souza et al. (6)        | 57                                   | Two regions: the Yaqui Valley, Mexico (1972-1991) and the Punjab Province of Pakistan (1978-1990)      | COP (area weighted)                  |                   |                               |                                   | 5-yr temporal diversity change in COP |

|                             |     |                                                              |         |                  |            |                       |                                     |
|-----------------------------|-----|--------------------------------------------------------------|---------|------------------|------------|-----------------------|-------------------------------------|
| Barbosa-Neto et al. (7)     | 112 | U.S. midwest                                                 | COP     | -                | RFLP       | -                     | -                                   |
| van Beuningen and Busch (8) | 270 | North America                                                | COP     | -                | none       | -                     | -                                   |
| Barrett et al. (9)          | 43  | U.S. Pacific Northwest                                       | COP     | -                | AFLP       | -                     | -                                   |
| Hartell et al. (10)         | 18  | Pakistan                                                     | COP     | -                | -          | Varietal area and age | Time trend of varietal area and age |
| Corbellini et al. (11)      | 40  | Central and South Europe                                     | COP     | -                | RFLP, AFLP | -                     | -                                   |
| Almanza-Pinzón et al. (12)  | 70  | 32 accessions from CIMMYT<br>38 accessions from 15 countries | COP     | -                | AFLP, SSR  | -                     | -                                   |
| Marić et al. (13)           | 14  | Croatia                                                      | COP     | Yes <sup>3</sup> | RAPD       | -                     | -                                   |
| Fufa et al. (14)            | 30  | U.S. Northern Great Plains                                   | COP     | Yes <sup>3</sup> | SSR, SRAP  | -                     | -                                   |
| Chao et al. (15)            | 43  | U.S.                                                         | none    | -                | SSR        | -                     | -                                   |
| Fradgley et al. (16)        | 454 | U.K.                                                         | Kinship | -                | SNP        | -                     | -                                   |
| Sthapit et al. (17)         | 320 | U.S. Pacific Northwest (1900-2019)                           | -       | -                | SNP        | Varietal area         | Time trend of varietal area         |

<sup>1</sup>Abbreviations for different molecular markers: AFLP (amplified fragment length polymorphism); RAPD (random amplified polymorphic DNA); RFLP (restriction fragment length polymorphism); SNP (single nucleotide polymorphisms); SRAP (sequence related amplified polymorphism); SSR (simple sequence repeats); STS (sequence tagged sites).

<sup>2</sup>Dash (-) indicates such measures were not used.

<sup>3</sup>Marić et al. (2004) includes 12 morphological traits; Fufa et al. (2005) includes 5 morphological traits and 4 end-use quality traits

## SI References

1. Cox, T.S., J.P. Murphy, D.M. Rodgers. Changes in genetic diversity in the red winter wheat regions of the United States. *PNAS*. 83, 5583-5586 (1986).
2. Murphy, J.P., T.S. Cox, and D.M. Rodgers. 1986. Cluster analysis of red winter wheat cultivars based upon coefficients of parentage. *Crop Science* 26(4):672–676.
3. Kim, H.S., and R.W. Ward. 1997. Genetic diversity in Eastern U.S. soft winter wheat (*Triticum aestivum* L. em. Thell.) based on RFLPs and coefficients of parentage. *Theoretical and Applied Genetics* 94(3):472–479.
4. Brennan, J.P. and D. Byerlee. The rate of crop varietal replacement on farms: measures and empirical results for wheat. *International Journal of Plant Varieties and Seeds* 4, 99-106 (1991).
5. Chen, H.B., J.M. Martin, M. Lavin, and L.E. Talbert. 1994. Genetic diversity in hard red spring wheat based on sequence-tagged-site PCR markers. *Crop Science* 34(6):cropsci1994.0011183X003400060037x.
6. Souza, E., P.N. Fox, D. Byerlee, and B. Skovmand. 1994. Spring Wheat Diversity in Irrigated Areas of Two Developing Countries. *Crop Science* 34(3):cropsci1994.0011183X003400030031x.
7. Barbosa-Neto, J.F., M.E. Sorrells, and G. Cisar. 1996. Prediction of heterosis in wheat using coefficient of parentage and RFLP-based estimates of genetic relationship. *Genome* 39(6):1142–1149.
8. van Beuningen, L.T., and R.H. Busch. 1997. Genetic diversity among North American spring wheat cultivars: I. analysis of the coefficient of parentage matrix. *Crop Science* 37(2):cropsci1997.0011183X003700020043x.
9. Barrett, B.A., K.K. Kidwell, and P.N. Fox. 1998. Comparison of AFLP and pedigree-based genetic diversity assessment methods using wheat cultivars from the Pacific Northwest. *Crop Science* 38(5):1271–1278.
10. Hartell, J., M. Smale, P.W. Heisey, and B. Senauer. The contribution of genetic resources and diversity to wheat productivity in the Punjab of Pakistan, In Smale, M. ed. *Farmers Gene Banks and Crop Breeding: Economic Analyses of Diversity in Wheat Maize and Rice*. Dordrecht: Springer Netherlands. (2000).
11. Corbellini, M., Perenzin, M., Accerbi, M., Vaccino, P. and Borghi, B., 2002. Genetic diversity in bread wheat, as revealed by coefficient of parentage and molecular markers, and its relationship to hybrid performance. *Euphytica* 123(2), pp.273-285.
12. Almanza-Pinzon, M.I., Khairallah, M., Fox, P.N. and Warburton, M.L., 2003. Comparison of molecular markers and coefficients of parentage for the analysis of genetic diversity among spring bread wheat accessions. *Euphytica* 130(1), pp.77-86.
13. Marić, S., Bolarić, S., Martinčić, J., Pejić, I. and Kozumplik, V., 2004. Genetic diversity of hexaploid wheat cultivars estimated by RAPD markers, morphological traits and coefficients of parentage. *Plant Breeding* 123(4), pp.366-369.
14. Fufa, H., P.S. Baenziger, B.S. Beecher, I. Dweikat, R.A. Graybosch, and K.M. Eskridge. 2005. Comparison of phenotypic and molecular marker-based classifications of hard red winter wheat cultivars. *Euphytica* 145(1):133–146.
15. Chao, S., W. Zhang, J. Dubcovsky, and M. Sorrells. 2007. Evaluation of genetic diversity and genome-wide linkage disequilibrium among U.S. wheat (*triticum aestivum* L.) germplasm representing different market classes. *Crop Science* 47(3):1018–1030.



16. Fradgley, N., K.A. Gardner, J. Cockram, J. Elderfield, J.M. Hickey, P. Howell, R. Jackson, I.J. Mackay. A large-scale pedigree resource of wheat reveals evidence for adaptation and selection by breeders. *PLoS Biology* (2019): doi.org/10.1371/journal.pbio.3000071.
17. Sthapit, S.R., K. Marlowe, D.C. Covarrubias, T.M. Ruff, J.D. Eagle, E.M. McGinty, M.A. Hooker, N.B. Duong, D.Z. Skinner, D.R. See. Genetic diversity in historical and modern wheat varieties of the U.S. Pacific Northwest. *Crop Science* (2020). doi: 10.1002/csc2.20299.
